# Supplementary material
Source: PubMed Central journal article supplement (PMC3957956)
Supplement: JVI.03309-13_zjv999098778so1.pdf [file JVI.03309-13_zjv999098778so1.pdf]

**Table S1:** TsZM-bl assay pseudovirus neutralization by plasma from all adjuvant groups.

| adjuvant group / animal number | time point | B clade    |            |        | C clade   |          | CRF01_AE  |
|--------------------------------|------------|------------|------------|--------|-----------|----------|-----------|
|                                |            | tier 1     |            | tier 2 | tier 2    |          | tier 2    |
|                                |            | BaL.26     | Bx08.16    | PVO.4  | DU123.6   | DU172.17 | 93TH976.1 |
| <b>group 1 (STS)</b>           |            |            |            |        |           |          |           |
| 4828                           | w0         | <20*       | <20        | <20    | <20       | <20      | <20       |
|                                | w23        | <b>55</b>  | <b>65</b>  | <20    | 21        | 26       | 26        |
|                                | w32        | 26         | <b>45</b>  | <20    | 25        | 26       | 23        |
| 4829                           | w0         | <20        | <20        | <20    | <20       | <20      | <20       |
|                                | w23        | <b>47</b>  | <b>60</b>  | <20    | <20       | <20      | <20       |
|                                | w32        | 36         | <b>50</b>  | <20    | <20       | <20      | <20       |
| 4844                           | w0         | <20        | <20        | <20    | <20       | <20      | <20       |
|                                | w23        | 32         | <b>53</b>  | <20    | <20       | <20      | <20       |
|                                | w32        | 38         | <b>66</b>  | <20    | 23        | 30       | <20       |
| <b>group 2 (STS+LA)</b>        |            |            |            |        |           |          |           |
| 4830                           | w0         | <20        | 22         | <20    | <20       | <20      | <20       |
|                                | w23        | <b>72</b>  | <b>98</b>  | <20    | <20       | <20      | <20       |
|                                | w32        | <b>56</b>  | <b>100</b> | <20    | 23        | 21       | <20       |
| 4831                           | w0         | <20        | <20        | <20    | <20       | <20      | <20       |
|                                | w23        | <b>64</b>  | <b>81</b>  | <20    | <20       | 21       | 22        |
|                                | w32        | <b>60</b>  | <b>79</b>  | <20    | 26        | 23       | 23        |
| 4845                           | w0         | <20        | 25         | <20    | <20       | 21       | <20       |
|                                | w23        | <b>69</b>  | <b>104</b> | <20    | 24        | 36       | 22        |
|                                | w32        | 37         | <b>72</b>  | <20    | <20       | <20      | <20       |
| <b>group 3 (STS+LA+oCpG)</b>   |            |            |            |        |           |          |           |
| 4838                           | w0         | <20        | <20        | <20    | <20       | 23       | <20       |
|                                | w23        | <b>99</b>  | <b>103</b> | <20    | 27        | 36       | 28        |
|                                | w32        | <b>71</b>  | <b>96</b>  | <20    | 25        | 35       | <20       |
| 4839                           | w0         | <20        | <20        | <20    | 20        | <20      | 22        |
|                                | w23        | <b>170</b> | <b>141</b> | <20    | <20       | <20      | <20       |
|                                | w32        | <b>170</b> | <b>133</b> | <20    | 20        | <20      | <20       |
| 4840                           | w0         | <20        | <20        | <20    | <20       | <20      | <20       |
|                                | w23        | <b>97</b>  | <b>96</b>  | <20    | <20       | <20      | <20       |
|                                | w32        | <b>83</b>  | <b>89</b>  | <20    | <20       | 24       | <20       |
| <b>group 4 (STS+LA+R848)</b>   |            |            |            |        |           |          |           |
| 4836                           | w0         | 20         | 25         | <20    | <20       | <20      | <20       |
|                                | w23        | <b>163</b> | <b>129</b> | <20    | <20       | <20      | <20       |
|                                | w32        | <b>89</b>  | <b>98</b>  | <20    | 34        | 30       | 22        |
| 4837                           | w0         | <20        | 36         | <20    | <20       | <20      | <20       |
|                                | w23        | <b>138</b> | <b>198</b> | <20    | <20       | <20      | <20       |
|                                | w32        | <b>67</b>  | <b>140</b> | <20    | <20       | 23       | <20       |
| 4848                           | w0         | <20        | <20        | <20    | <20       | <20      | <20       |
|                                | w23        | <b>49</b>  | <b>46</b>  | <20    | <20       | <20      | <20       |
|                                | w32        | <b>40</b>  | <b>44</b>  | <20    | <20       | <20      | <20       |
| <b>group 5 (STS+oCpG)</b>      |            |            |            |        |           |          |           |
| 4834                           | w0         | <20        | 22         | <20    | <20       | <20      | <20       |
|                                | w23        | <b>139</b> | <b>135</b> | <20    | <20       | 25       | <20       |
|                                | w32        | <b>74</b>  | <b>96</b>  | <20    | 23        | 22       | 21        |
| 4835                           | w0         | <20        | 22         | <20    | <20       | <20      | <20       |
|                                | w23        | <b>93</b>  | <b>86</b>  | <20    | <20       | <20      | <20       |
|                                | w32        | <b>61</b>  | <b>67</b>  | <20    | <20       | <20      | <20       |
| 4847                           | w0         | <20        | 23         | <20    | <20       | <20      | <20       |
|                                | w23        | <b>58</b>  | <b>242</b> | <20    | <20       | <20      | <20       |
|                                | w32        | <b>50</b>  | <b>119</b> | <20    | 26        | 21       | <20       |
| <b>group 6 (STS+R848)</b>      |            |            |            |        |           |          |           |
| 4832                           | w0         | <20        | 25         | <20    | <20       | <20      | <20       |
|                                | w23        | <b>201</b> | <b>272</b> | <20    | 21        | <20      | 26        |
|                                | w32        | <b>100</b> | <b>170</b> | <20    | 21        | <20      | 25        |
| 4833                           | w0         | <20        | <20        | <20    | <20       | <20      | <20       |
|                                | w23        | <b>143</b> | <b>118</b> | <20    | <20       | 23       | <20       |
|                                | w32        | <b>69</b>  | <b>91</b>  | <20    | 22        | <20      | <20       |
| 4846                           | w0         | <20        | 23         | <20    | <20       | <20      | <20       |
|                                | w23        | <b>107</b> | <b>161</b> | <20    | 32        | <20      | <20       |
|                                | w32        | <b>129</b> | <b>142</b> | <20    | 24        | 22       | <20       |
| <b>group 7 (STS+oCpG+R848)</b> |            |            |            |        |           |          |           |
| 4841                           | w0         | <20        | <20        | <20    | <20       | 21       | <20       |
|                                | w23        | <b>827</b> | <b>380</b> | <20    | 26        | 26       | 31        |
|                                | w32        | <b>716</b> | <b>276</b> | <20    | <b>48</b> | 30       | 23        |
| 4842                           | w0         | <20        | <20        | <20    | 24        | <20      | <20       |
|                                | w23        | <b>173</b> | <b>114</b> | <20    | 27        | 27       | 24        |
|                                | w32        | <b>134</b> | <b>181</b> | <20    | 34        | 22       | <20       |
| 4843                           | w0         | <20        | <20        | <20    | <20       | <20      | <20       |
|                                | w23        | <b>121</b> | <b>155</b> | <20    | <20       | <20      | 22        |
|                                | w32        | <b>128</b> | <b>145</b> | <20    | 26        | <20      | <20       |

\* Plasma dilution resulting in 50% reduction of infection.

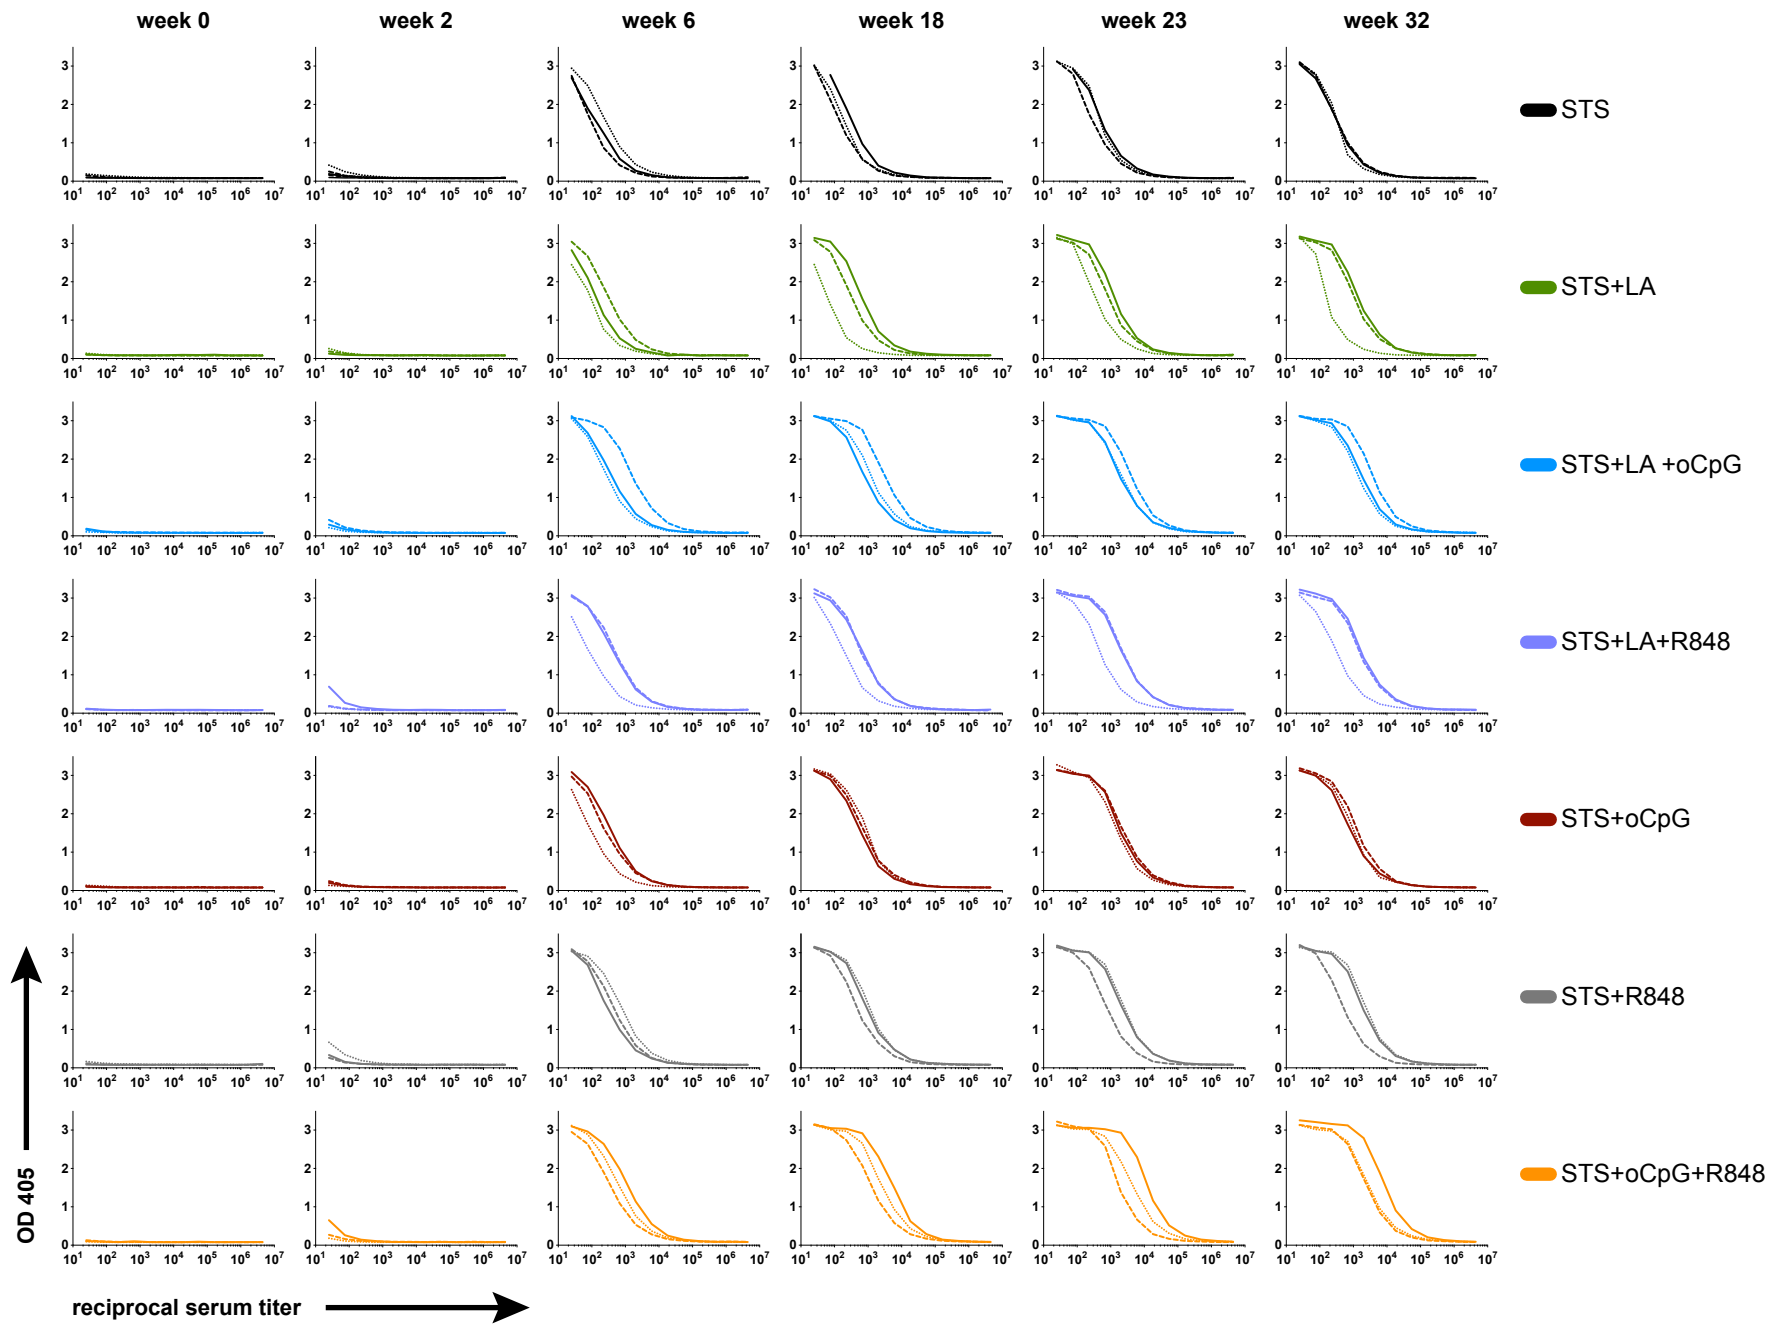

**Figure S1**

*Supplemental Figure S1. ELISA binding data for antibodies elicited by gp140 B.63521 in oil-in-water emulsions.*

ELISA data underlying the endpoint titer results shown in Fig. 2 are plotted. Adjuvant mixtures are constant across each row, each column represents an assayed time point. In each row, solid lines, dashed lines, and dotted lines represent individual animals.

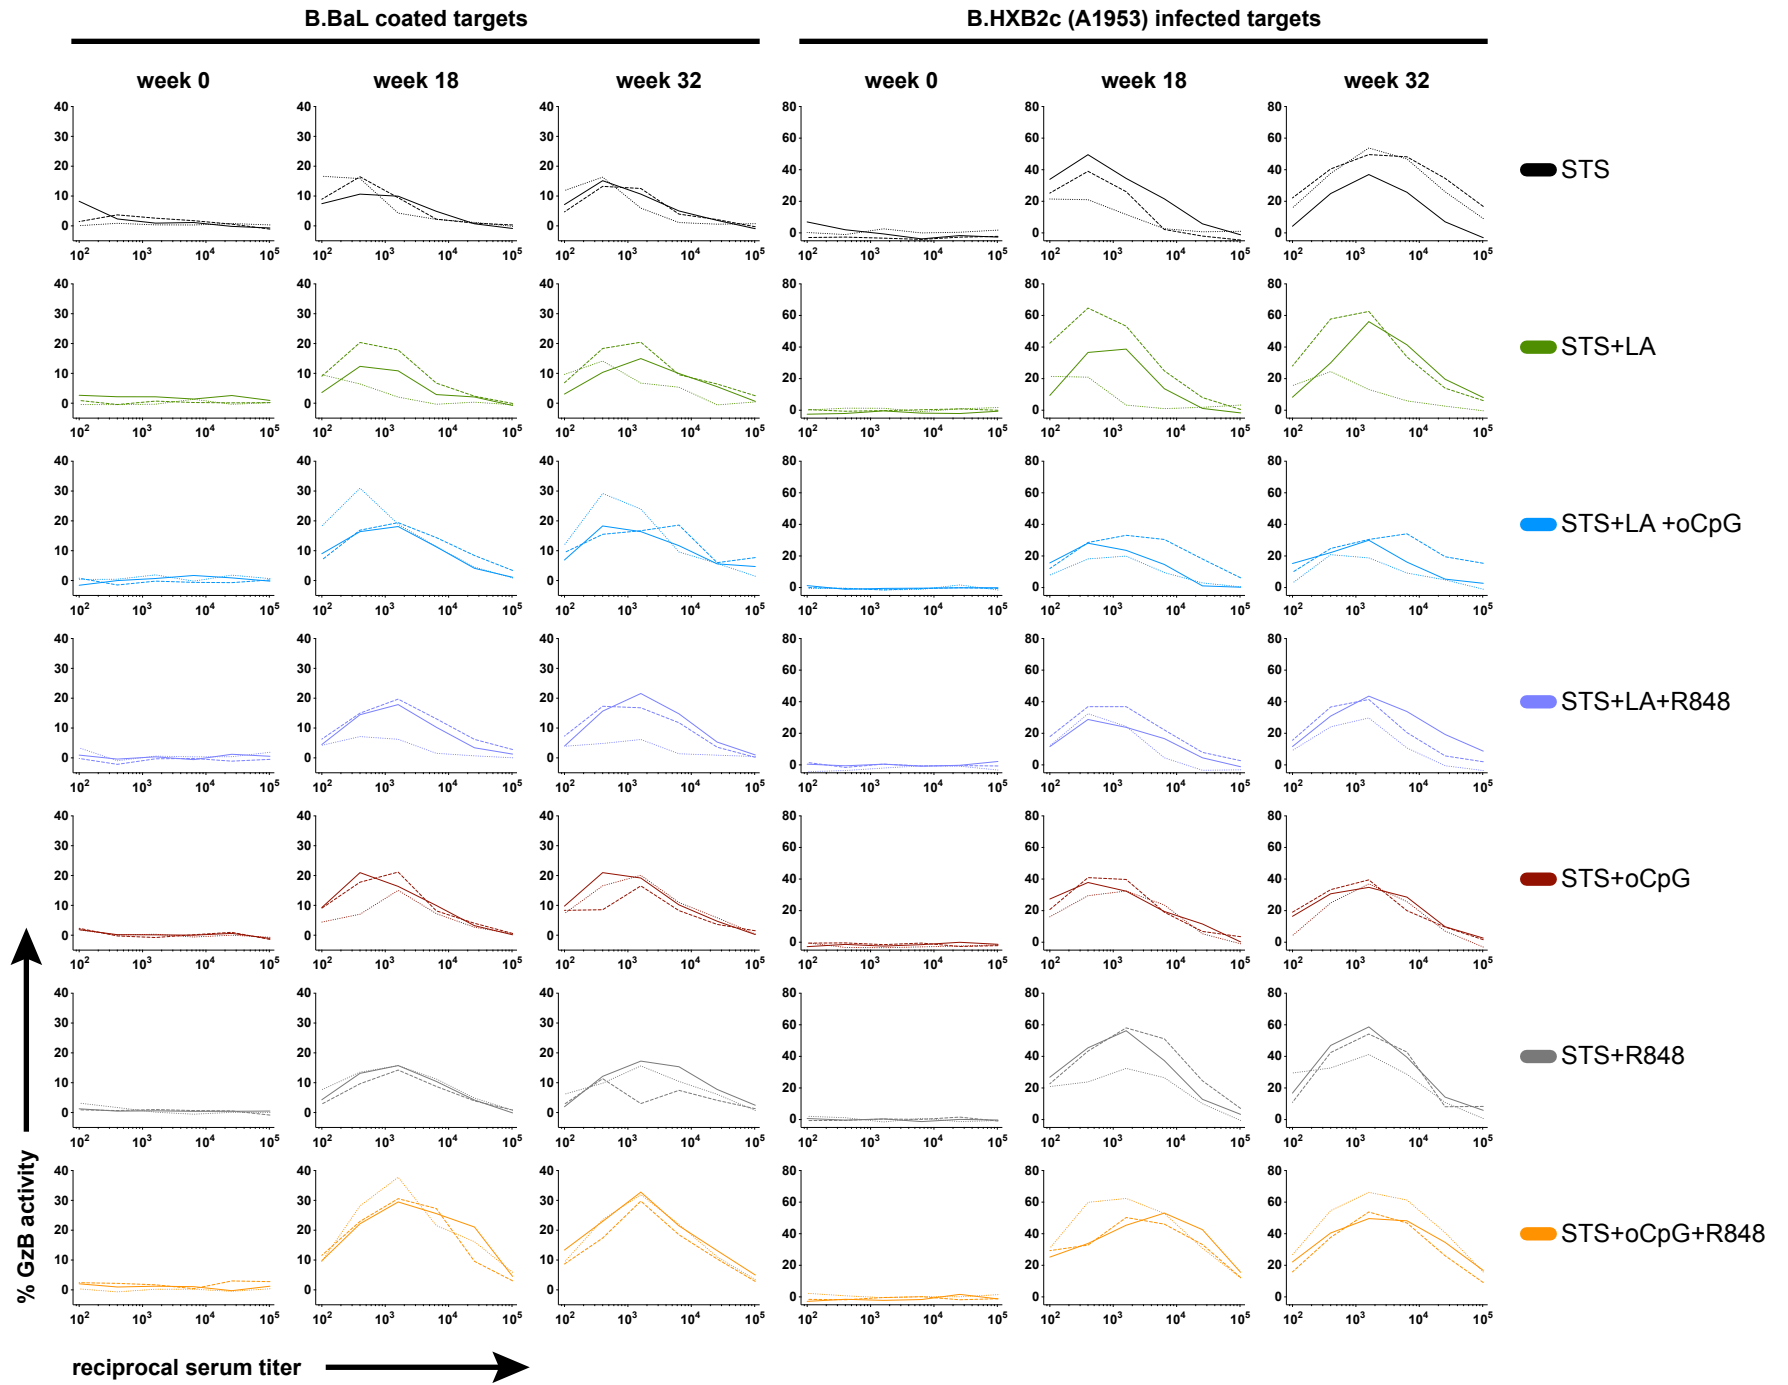

**Figure S2**

*Supplemental Figure S2. ADCC data for antibodies elicited by gp140 B.63521 in oil-in-water emulsions.*

ADCC data underlying the results shown in Fig. 6 are plotted. Adjuvant mixtures are constant across each row, each column represents an assayed time point. In each row, solid lines, dashed lines, and dotted lines represent individual animals. Data on the left in the first three columns are for B.BaL-coated target cells and underly the data shown in Fig. 6. Data on the right in the final three columns are for chronically infected target cells (A1953).
